# Supplementary material for: Aberrant methylation of microRNA-34b/c is a predictive marker of metachronous gastric cancer risk
Source: Springer Nature journal article supplement (doi:10.1007/s00535-013-0861-7), 2013-08-12
Supplement: MOESM1 [file 8585674]

# Supplementary Figure 1

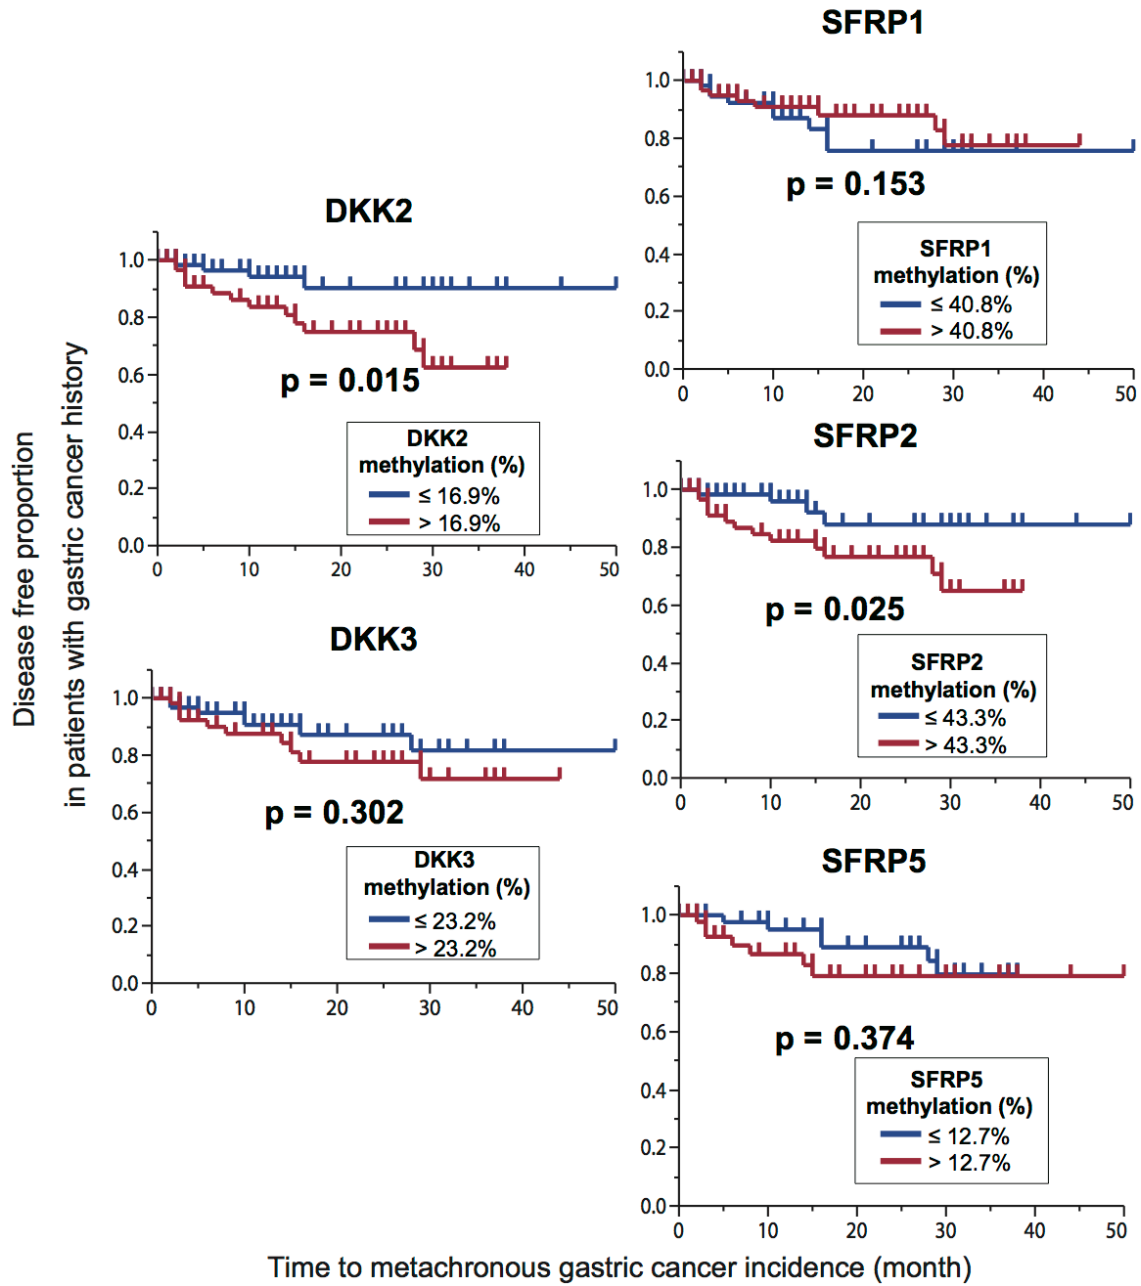

Supplementary Figure 1

Kaplan-Meier analysis showing the effect of methylation of the indicated genes in the gastric body on metachronous GC-free survival. Note that higher methylation levels of *SFRP2* and *DKK2* are significantly associated with shorter metachronous GC-free survival.

# Supplementary Figure 2

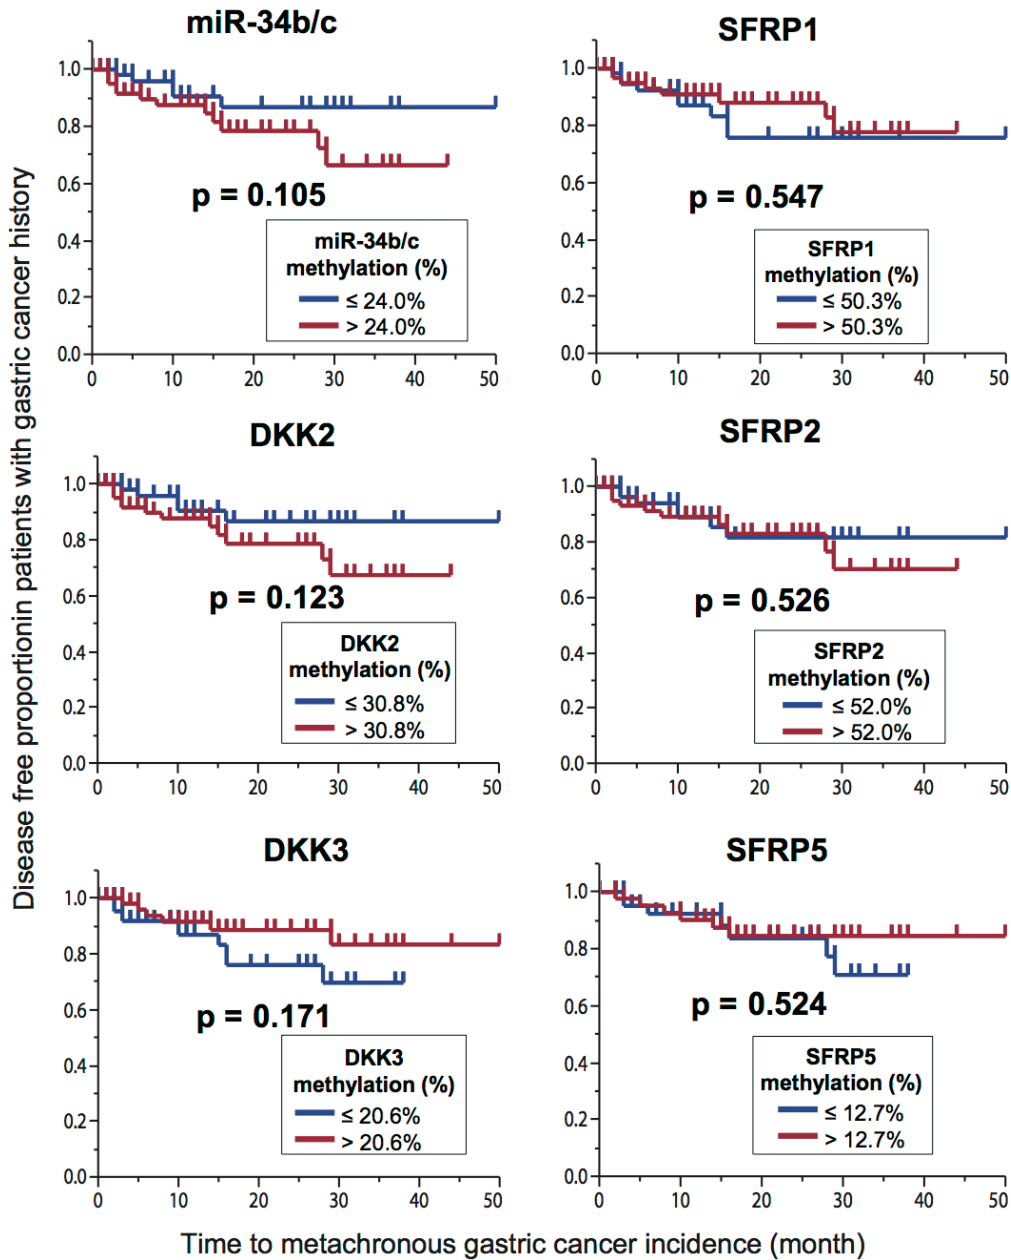

Supplementary Figure 2

Kaplan-Meier analysis showing the effect of methylation of the indicated genes in the gastric antrum on metachronous GC-free survival.

# Supplementary Figure 3

**A**

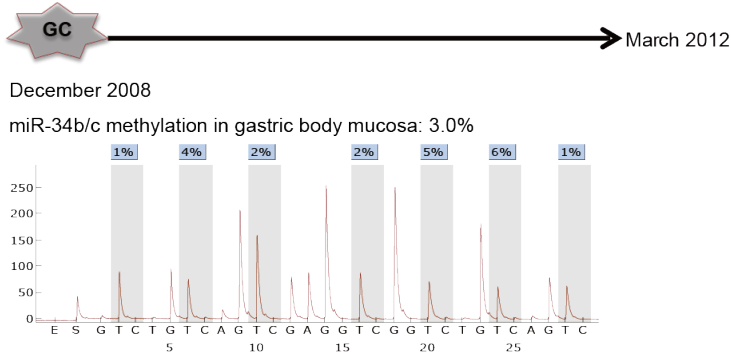

**B**

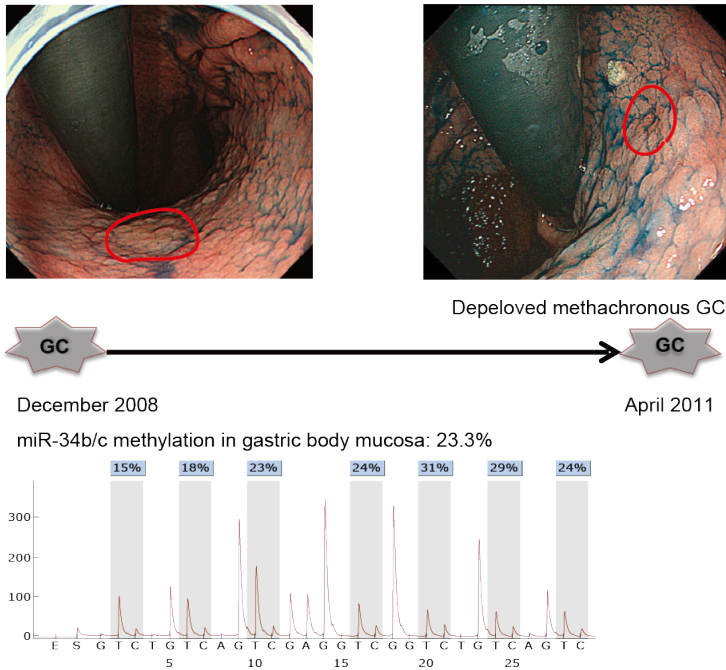

## Supplementary Figure 3

Representative patients exhibiting low or high levels of *miR-34b/c* methylation in their gastric body. (A) Patient with a low *miR-34b/c* methylation level (3.0%), who did not develop metachronous GC during the follow-up period. (B) Patient with a high methylation level (23.3%), who developed metachronous GC in the remnant stomach 2 years after curative endoscopic resection.

## Supplementary Figure 4

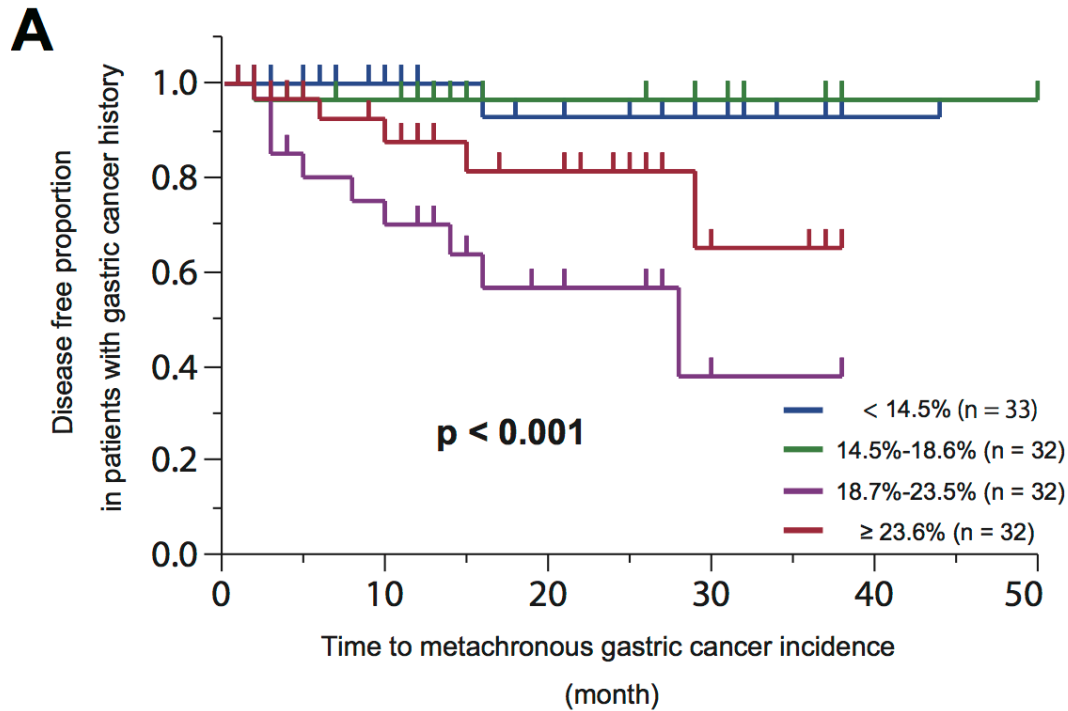

**B**

| Methylation (%) | Periods | Total | Non MGC | MGC | incidence rate<br>(%) | 95%CI |        |
|-----------------|---------|-------|---------|-----|-----------------------|-------|--------|
|                 |         |       |         |     |                       | Lower | Upper  |
| <14.5%          | 1-year  | 33    | 33      | 0   | 0.0%                  | 0.0%  | 10.6%* |
|                 | 2-year  | 14    | 13      | 1   | 7.1%                  | 0.0%  | 20.6%  |
|                 | 3-year  | 11    | 11      | 0   | 7.1%                  | 0.0%  | 20.6%  |
| 14.5%-18.6%     | 1-year  | 32    | 31      | 1   | 3.4%                  | 0.0%  | 10.1%  |
|                 | 2-year  | 17    | 17      | 0   | 3.4%                  | 0.0%  | 10.1%  |
|                 | 3-year  | 13    | 13      | 0   | 3.4%                  | 0.0%  | 10.1%  |
| 18.7%-23.5%     | 1-year  | 32    | 25      | 7   | 29.9%                 | 10.9% | 48.9%  |
|                 | 2-year  | 12    | 10      | 2   | 43.4%                 | 20.7% | 66.1%  |
|                 | 3-year  | 5     | 4       | 1   | 62.3%                 | 28.6% | 96.0%  |
| ≥23.6%          | 1-year  | 32    | 29      | 3   | 7.5%                  | 0.0%  | 17.7%  |
|                 | 2-year  | 16    | 15      | 1   | 18.7%                 | 1.6%  | 35.8%  |
|                 | 3-year  | 8     | 7       | 1   | 34.9%                 | 3.3%  | 66.5%  |

\*Calculated by binomial exact method with the number of at risk at the beginning.  
CI, confidence interval; MGC, metachronous gastric cancer

### Supplementary Figure 4

(A) Kaplan-Meier analysis showing the effect of *miR-34b/c* methylation on metachronous GC-free survival. Patients were stratified into four groups according to their level of *miR-34b/c* methylation. (B) Methylation of *miR-34b/c* in noncancerous gastric body mucosa and its association with metachronous gastric cancer.

Supplementary Table1. Sequences of the primers used in this study

|                  |                     | forward                      | reverse                          | product size |
|------------------|---------------------|------------------------------|----------------------------------|--------------|
| <i>miR-34b/c</i> | pyroseq PCR         | GGTYGAGTGATTGTGGYGGGGG       | Bio-CCTCCATCTTCTAAACRTCTCCCTTA   | 176 bp       |
|                  | Sequence primer     | TAATYGTTTTTGAATTT            |                                  |              |
|                  | Sequence to analyze | YGYGGGTYGAGGGGYGGGGYGGGYGYG  |                                  |              |
| <i>SFRP1</i>     | pyroseq PCR         | GTTTTGTTTTTAAGGGGTGTTGAG     | Bio-CTCCRAAAACTACAAACTAAAATAC    | 202 bp       |
|                  | Sequence primer     | GYGTTTGGTTTTAGTAAAT          |                                  |              |
|                  | Sequence to analyze | TTGYGYGGGGYGGTTTTYGAGGGTTYG  |                                  |              |
| <i>SFRP2</i>     | pyroseq PCR         | AATTTYGGATTGGGGTAAATAAGTT    | Bio-TTAAACAACAAACAAAAAACCTAACC   | 182 bp       |
|                  | Sequence primer     | YGTTTYGTTAGTATTTGG           |                                  |              |
|                  | Sequence to analyze | TYGYGAGGTYGTTYGYG            |                                  |              |
| <i>DKK2</i>      | pyroseq PCR         | GGGTTTTTTGATTAATTAAGAGGAGA   | Bio-TCTACAATAACTAAAAACAATCAAATAC | 179 bp       |
|                  | Sequence primer     | TAATTAAGAGGAGAGTTAAA         |                                  |              |
|                  | Sequence to analyze | TYGTYGAGATTTYGGYG            |                                  |              |
| <i>DKK3</i>      | pyroseq PCR         | GATTTTGTTGAGTTTAGTTTTTTTTGGT | Bio-CAAACCTCTCTCAACCCCTACCTA     | 123bp        |
|                  | Sequence primer     | TTTTTTGGTGGATGTG             |                                  |              |
|                  | Sequence to analyze | GGGYGGGGYGTTYGAGTAGGATTYGAYG |                                  |              |

Y=C or T, R=A or G
